# Supplementary material
Source: Springer Nature journal article supplement (https://www.springermedizin.de/resource/supplementary/13256_2010_2031_MOESM2_ESM.pdf/9649726)

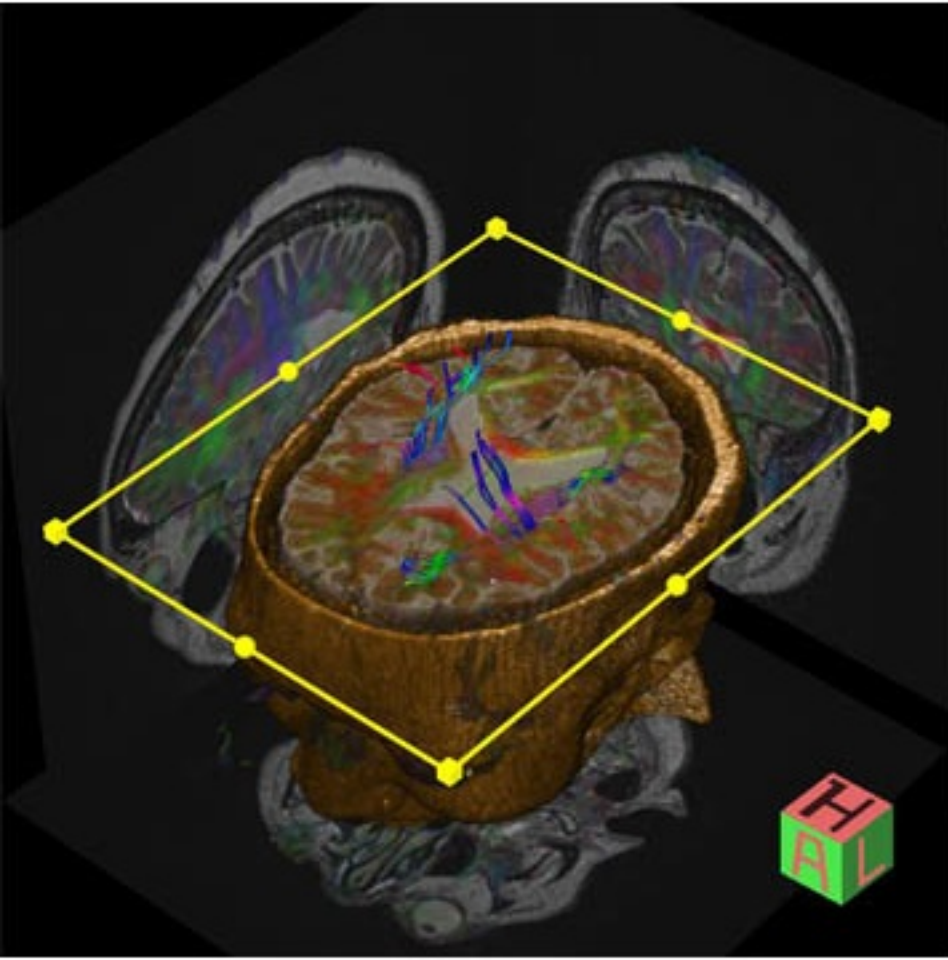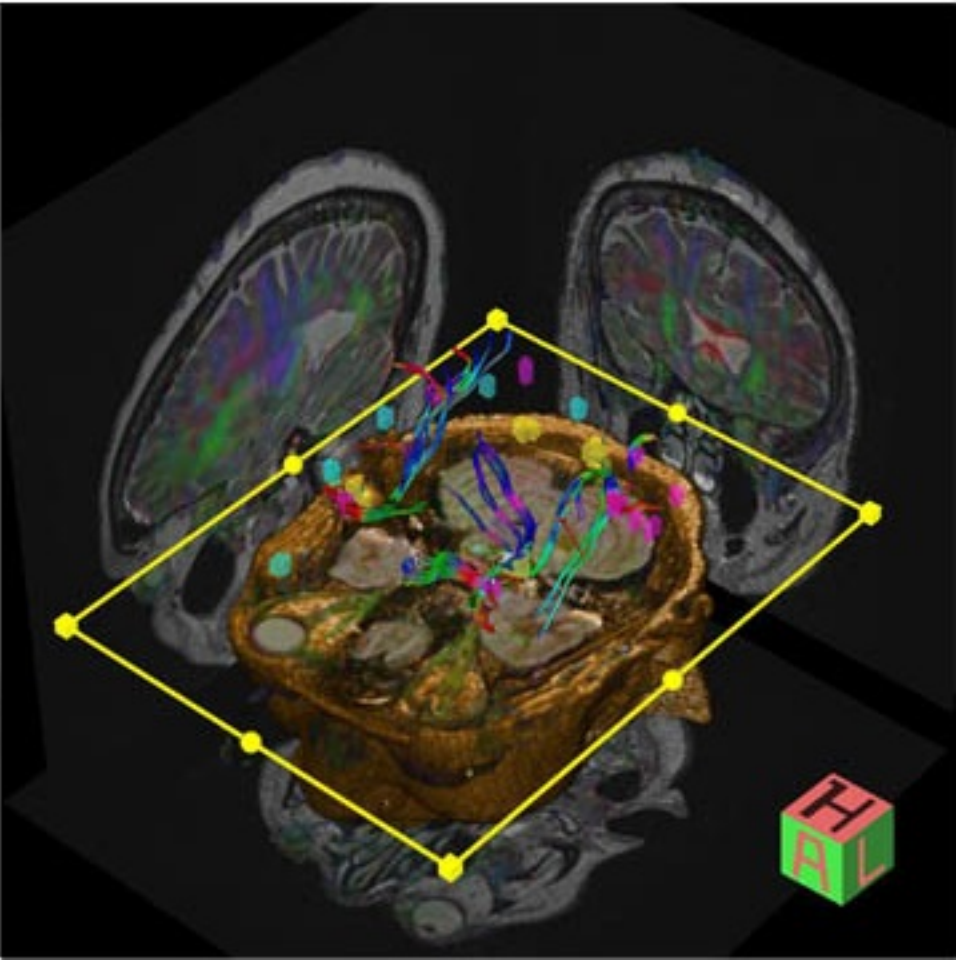

Supplement: MOESM2 [file 9649726]
